# Supplementary material
Source: publisher site journal article supplement (https://www.spandidos-publications.com/7743/downloadSupplementary)
Supplement: Supplementary file 1 [file downloadSupplementary]

Table SI. Newcastle-Ottawa Scale evaluation criteria for cohort studies.

| Evaluation criteria                                                              | First author, year (Ref.)            |                                      |                                        |                                         |                                       |                                |                                         |                                 |                                        |                                         |                                         |
|----------------------------------------------------------------------------------|--------------------------------------|--------------------------------------|----------------------------------------|-----------------------------------------|---------------------------------------|--------------------------------|-----------------------------------------|---------------------------------|----------------------------------------|-----------------------------------------|-----------------------------------------|
|                                                                                  | Kim<br><i>et al</i> ,<br>2024<br>(8) | Wu<br><i>et al</i> ,<br>2022<br>(15) | Fang<br><i>et al</i> ,<br>2023<br>(23) | Longo<br><i>et al</i> ,<br>2024<br>(30) | Yao<br><i>et al</i> ,<br>2024<br>(31) | Li <i>et al</i> ,<br>2023 (32) | Hoffmann<br><i>et al</i> , 2023<br>(33) | Xie <i>et al</i> ,<br>2023 (35) | Peng<br><i>et al</i> ,<br>2023<br>(36) | Gross<br><i>et al</i> ,<br>2021<br>(39) | Daher<br><i>et al</i> ,<br>2022<br>(40) |
| Item                                                                             |                                      |                                      |                                        |                                         |                                       |                                |                                         |                                 |                                        |                                         |                                         |
| Representativeness of the exposed cohort                                         | 1                                    | 1                                    | 1                                      | 1                                       | 1                                     | 1                              | 1                                       | 1                               | 1                                      | 1                                       | 1                                       |
| Selection of the non-exposed cohort                                              | 1                                    | 1                                    | 1                                      | 1                                       | 1                                     | 1                              | 1                                       | 1                               | 1                                      | 1                                       | 1                                       |
| Ascertainment of exposure                                                        | 1                                    | 1                                    | 1                                      | 1                                       | 1                                     | 1                              | 1                                       | 1                               | 1                                      | 1                                       | 1                                       |
| Demonstration that the outcome of interest was not present at start of the study | 1                                    | 1                                    | 1                                      | 1                                       | 1                                     | 1                              | 1                                       | 1                               | 1                                      | 1                                       | 1                                       |
| Comparability of cohorts based on the design                                     | 1                                    | 2                                    | 2                                      | 2                                       | 2                                     | 2                              | 2                                       | 2                               | 2                                      | 2                                       | 2                                       |
| Outcome                                                                          |                                      |                                      |                                        |                                         |                                       |                                |                                         |                                 |                                        |                                         |                                         |
| Assessment of outcome                                                            | 1                                    | 1                                    | 1                                      | 1                                       | 1                                     | 1                              | 1                                       | 1                               | 1                                      | 1                                       | 1                                       |
| Assessment of whether follow-up was long enough for outcomes to occur            | 1                                    | 1                                    | 1                                      | 1                                       | 1                                     | 1                              | 1                                       | 1                               | 1                                      | 1                                       | 1                                       |

|                                  |   |   |   |   |   |   |   |   |   |   |   |
|----------------------------------|---|---|---|---|---|---|---|---|---|---|---|
| Adequacy of follow-up of cohorts | 1 | 1 | 1 | 1 | 1 | 1 | 1 | 1 | 1 | 1 | 1 |
| Total scoring                    | 8 | 9 | 9 | 9 | 9 | 9 | 9 | 9 | 9 | 9 | 9 |

Table SII. Methodological Index for Non-Randomized Studies evaluation criteria for single-arm studies.

| Evaluation criteria                                  | First author, year (Ref.)      |                                     |                                   |                                |                                   |                                 |                                  |                                 |                                  |
|------------------------------------------------------|--------------------------------|-------------------------------------|-----------------------------------|--------------------------------|-----------------------------------|---------------------------------|----------------------------------|---------------------------------|----------------------------------|
|                                                      | Wu <i>et al</i> ,<br>2022 (15) | Diamond <i>et al</i> ,<br>2022 (22) | Perez <i>et al</i> ,<br>2021 (29) | Li <i>et al</i> ,<br>2023 (32) | Welsh <i>et al</i> ,<br>2020 (34) | Liu <i>et al</i> ,<br>2022 (37) | Chen <i>et al</i> ,<br>2022 (38) | Cai <i>et al</i> ,<br>2023 (41) | Meng <i>et al</i> ,<br>2022 (42) |
| Clearly stated aim                                   | 2                              | 2                                   | 2                                 | 2                              | 2                                 | 2                               | 2                                | 2                               | 2                                |
| Inclusion of consecutive patients                    | 2                              | 2                                   | 2                                 | 2                              | 2                                 | 2                               | 2                                | 2                               | 2                                |
| Prospective collection of data                       | 2                              | 2                                   | 2                                 | 2                              | 2                                 | 2                               | 2                                | 2                               | 2                                |
| Endpoints appropriate to the aim of the study        | 2                              | 2                                   | 2                                 | 2                              | 2                                 | 2                               | 2                                | 2                               | 2                                |
| Unbiased assessment of the study endpoint            | 1                              | 1                                   | 2                                 | 1                              | 1                                 | 1                               | 1                                | 1                               | 1                                |
| Follow-up period appropriate to the aim of the study | 2                              | 2                                   | 2                                 | 1                              | 2                                 | 2                               | 2                                | 2                               | 2                                |
| Loss to follow-up of <5%                             | 2                              | 2                                   | 2                                 | 2                              | 2                                 | 2                               | 2                                | 2                               | 2                                |
| Prospective calculation of the study size            | 0                              | 0                                   | 1                                 | 0                              | 0                                 | 0                               | 0                                | 0                               | 0                                |
| An adequate control group                            | *                              | *                                   | *                                 | *                              | *                                 | *                               | *                                | *                               | *                                |
| Contemporary groups                                  | *                              | *                                   | *                                 | *                              | *                                 | *                               | *                                | *                               | *                                |

|                                |    |    |    |    |    |    |    |    |    |
|--------------------------------|----|----|----|----|----|----|----|----|----|
| Baseline equivalence of groups | *  | *  | *  | *  | *  | *  | *  | *  | *  |
| Adequate statistical analyses  | *  | *  | *  | *  | *  | *  | *  | *  | *  |
| Total scoring                  | 13 | 13 | 15 | 12 | 13 | 13 | 13 | 13 | 13 |

\*Not applicable.
